# Supplementary material for: Effects of Perioperative Oral Management in Patients with Cancer
Source: MDPI journal article supplement (doi:10.3390/jcm11216576), 2022-11-06
Supplement: s1 [file s1]

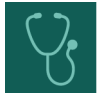

Supplementary Table S1. Primary lesions of the No POM and POM groups.

| No POM (n=8,208)             |       |      | POM (n=1,233)                |     |      |
|------------------------------|-------|------|------------------------------|-----|------|
|                              | n     | %    |                              | n   | %    |
| Breast cancer                | 1,033 | 12.6 | Colorectal cancer            | 410 | 33.3 |
| Stomach cancer               | 982   | 12.0 | Stomach cancer               | 303 | 24.6 |
| Hematopoietic tumor          | 958   | 11.7 | Lung cancer                  | 175 | 14.2 |
| Gynecologic cancer           | 930   | 11.3 | Head and neck cancer         | 73  | 5.9  |
| Colorectal cancer            | 857   | 10.4 | Liver and gallbladder cancer | 62  | 5.0  |
| Lung cancer                  | 749   | 9.1  | Pancreas cancer              | 48  | 3.9  |
| Liver and gallbladder cancer | 693   | 8.4  | Hematopoietic tumor          | 42  | 3.4  |
| prostate cancer              | 376   | 4.6  | Kidney cancer                | 32  | 2.6  |
| Head and neck cancer         | 299   | 3.6  | Thyroid gland cancer         | 25  | 2.0  |
| Kidney cancer                | 279   | 3.4  | Esophageal cancer            | 20  | 1.6  |
| Pancreas cancer              | 253   | 3.1  | Breast cancer                | 14  | 1.1  |
| Esophageal cancer            | 194   | 2.4  | Small intestine cancer       | 7   | 0.6  |
| Thyroid gland cancer         | 160   | 1.9  | Gynecologic cancer           | 6   | 0.5  |
| Brain tumor                  | 153   | 1.9  | Prostate cancer              | 6   | 0.5  |
| Musculoskeletal cancer       | 74    | 0.9  | Mediastinal cancer           | 6   | 0.5  |
| Small intestine cancer       | 59    | 0.7  | Brain tumor                  | 2   | 0.2  |
| Mediastinal cancer           | 54    | 0.7  | Musculoskeletal cancer       | 1   | 0.1  |
| Skin cancer                  | 40    | 0.5  | Other                        | 1   | 0.1  |
| Other                        | 31    | 0.4  | Skin cancer                  | 0   | 0    |
| Malignant eye tumor          | 20    | 0.2  | Malignant eye tumor          | 0   | 0    |
| Male genital cancer          | 10    | 0.1  | Male genital cancer          | 0   | 0    |
| Malignant cardiac tumor      | 4     | 0.0  | Malignant cardiac tumor      | 0   | 0    |
